# Unsupervised tensor decomposition-based method to extract candidate transcription factors as histone modification bookmarks in post-mitotic transcriptional reactivation

Y-H. Taguchi<sup>1,\*</sup> and Turki Turki<sup>2</sup>

<sup>1</sup> *Department of Physics, Chuo University, Tokyo, Japan*

<sup>2</sup> *Department of Computer Science, King Abdulaziz University, Jeddah, Saudi Arabia*

Correspondence\*:  
Corresponding Author  
tag@granular.com

## 2 ABSTRACT

The histone group added to a gene sequence must be released during mitosis to halt transcription during the DNA replication stage of the cell cycle. However, the detailed mechanism of this transcription regulation remains unclear. In particular, it is not realistic to reconstruct all appropriate histone modifications throughout the genome from scratch after mitosis. Thus, it is reasonable to assume that there might be a type of “bookmark” that retains the positions of histone modifications, which can be readily restored after mitosis. We developed a novel computational approach comprising tensor decomposition (TD)-based unsupervised feature extraction (FE) to identify transcription factors (TFs) that bind to genes associated with reactivated histone modifications as candidate histone bookmarks. To the best of our knowledge, this is the first application of TD-based unsupervised FE to the cell division context and phases pertaining to the cell cycle in general. The candidate TFs identified with this approach were functionally related to cell division, suggesting the suitability of this method and the potential of the identified TFs as bookmarks for histone modification during mitosis.

**Keywords:** advanced unsupervised learning, tensor decomposition, histone modification, bookmark, mitosis, transcription

## 1 INTRODUCTION

During the cell division process, gene transcription must be initially terminated and then reactivated once cell division is complete. However, the specific mechanism and factors controlling this process of transcription regulation remain unclear. Since it would be highly time- and energy-consuming to mark all genes that need to be transcribed from scratch after each cycle of cell division, it has been proposed that genes that need to be transcribed are “bookmarked” to easily recover these positions for reactivation (Festuccia et al., 2017; Bellec et al., 2018; Zaidi et al., 2018; Teves et al., 2016). Despite several proposals, the actual mechanism and nature of these “bookmarks” have not yet been identified. John and Workman (1998) suggested that condensed mitotic chromosomes can act as bookmarks, some histone modifications were suggested to serve as these bookmarks (Wang and Higgins, 2013; Kouskouti and Talianidis, 2005; Chow et al., 2005), and some transcription factors (TFs) have also been identified as

27 potential bookmarks (Dey et al., 2000; Kadauke et al., 2012; Xing et al., 2005; Christova and Oelgeschläger,  
28 2001; Festuccia et al., 2016).

29 Recently, Kang et al. (2020) suggested that histone 3 methylation or trimethylation at lysine 4 (H3K4me1  
30 and H3K4me3, respectively) can act as a “bookmark” to identify genes to be transcribed, and that a limited  
31 number of TFs might act as bookmarks. However, there has been no comprehensive search of candidate  
32 “bookmark” TFs based on large-scale datasets.

33 We here propose a novel computational approach to search for TFs that might act as “bookmarks”  
34 during mitosis, which involves tensor decomposition (TD)-based unsupervised feature extraction (FE)  
35 (Fig. 1). In brief, after fragmenting the whole genome into DNA regions of 25,000 nucleotide, the histone  
36 modifications within each region were summed. In this context, each DNA region is considered a tensor  
37 and various singular-value vectors associated with either the DNA region or experimental conditions (e.g.,  
38 histone modification, cell line, and cell division phase) are derived. After investigating singular-value  
39 vectors attributed to various experimental conditions, the DNA regions with significant associations of  
40 singular-value vectors attributed to various experimental conditions were selected as potentially biologically  
41 relevant regions. The genes included in the selected DNA regions were then identified and uploaded to the  
42 enrichment server Enrichr to identify TFs that target the genes. To our knowledge, this is the first method  
43 utilizing a TD-based unsupervised FE approach in a fully unsupervised fashion to comprehensively search  
44 for possible candidate bookmark TFs.

## 2 MATERIALS AND METHODS

### 45 2.1 Histone modification

46 The whole-genome histone modification profile was downloaded from the Gene Expression Omnibus  
47 (GEO) GSE141081 dataset. Sixty individual files (with extension .bw) were extracted from the raw GEO  
48 file. After excluding six CCCTC-binding factor (CTCF) chromatin immunoprecipitation-sequencing files  
49 and six 3rd replicates of histone modification files, a total of 48 histone modification profiles were retained  
50 for analysis. The DNA sequences of each chromosome were divided into 25,000-bp regions. Note that the  
51 last DNA region of each chromosome may be shorter since the total nucleotide length does not always  
52 divide into equal regions of 25,000. Histone modifications were then summed in each DNA region, which  
53 was used as the input value for the analysis. In total,  $N = 123,817$  DNA regions were available for analysis.  
54 Thus, with approximately 120,000 regions of 25,000 bp each, we covered the approximate human genome  
55 length of  $3 \times 10^9$ .

### 56 2.2 Tensor Data Representation

57 Histone modification profiles were formatted as a tensor,  $x_{ijkms} \in \mathbb{R}^{N \times 2 \times 4 \times 3 \times 2}$ , which corresponds to  
58 the  $k$ th histone modification ( $k = 1$ : acetylation, H3K27ac;  $k = 2$ : H3K4me1;  $k = 3$ : H3K4me3; and  
59  $k = 4$ : Input) at the  $i$ th DNA region of the  $j$ th cell line ( $j = 1$ : RPE1 and  $j = 2$ : USO2) at the  $m$ th phase  
60 of the cell cycle ( $m = 1$ : interphase,  $m = 2$ : prometaphase, and  $m = 3$ : anaphase/telophase) of the  $s$ th  
61 replicate ( $s = 1, 2$ ).  $x_{ijkms}$  was normalized as  $\sum_i x_{ijkms} = 0$  and  $\sum_i x_{ijkms}^2 = N$  (Table 1). There are  
62 two biological replicates for each of the combinations of one of cell lines (either RPE1 or USO2), one of  
63 ChIP-seq (either acetylation or H3Kme1 or H3Kme4 or inout), and one of three cell cycle phases.

## 64 2.3 Tensor Decomposition

65 Higher-order singular value decomposition (HOSVD) (Taguchi, 2020) was applied to  $x_{ijkms}$  to obtain  
66 the decomposition

$$x_{ijkms} = \sum_{\ell_1=1}^2 \sum_{\ell_2=1}^4 \sum_{\ell_3=1}^3 \sum_{\ell_4=1}^2 \sum_{\ell_5=1}^N G(\ell_1 \ell_2 \ell_3 \ell_4 \ell_5) u_{\ell_1 j} u_{\ell_2 k} u_{\ell_3 m} u_{\ell_4 s} u_{\ell_5 i}, \quad (1)$$

67 where  $G \in \mathbb{R}^{2 \times 4 \times 3 \times 2 \times N}$  is the core tensor, and  $u_{\ell_1 j} \in \mathbb{R}^{2 \times 2}$ ,  $u_{\ell_2 k} \in \mathbb{R}^{4 \times 4}$ ,  $u_{\ell_3 m} \in \mathbb{R}^{3 \times 3}$ ,  $u_{\ell_4 s} \in \mathbb{R}^{2 \times 2}$ ,  
68 and  $u_{\ell_5 i} \in \mathbb{R}^{N \times N}$  are singular-value **vector** matrices, which are all orthogonal matrices. **The reason for**  
69 **using the complete representation instead of the truncated representation of TD is that we employed HOSVD**  
70 **to compute TD. In HOSVD, the truncated representation is equal to that of the complete representation;**  
71 **i.e.,  $u_{\ell_1 j}$ ,  $u_{\ell_2 k}$ ,  $u_{\ell_3 m}$ , and  $u_{\ell_4 s}$  are not altered between the truncated and the full representation. For more**  
72 **details, see Taguchi (2020).**

73 Here is a summary on how to compute eq. (1) using the HOSVD algorithm, although it has been described  
74 in detail previously (Taguchi, 2020). At first,  $x_{ijkms}$  is unfolded to a matrix,  $x_{i(jkms)} \in \mathbb{R}^{N \times 48}$ . Then  
75 SVD is applied to get

$$x_{i(jkms)} = \sum_{\ell_5=1}^N u_{\ell_5 i} \lambda_{\ell_5} v_{\ell_5 jkms} \quad (2)$$

76 Then, only  $u_{\ell_5 i}$  is retained, and  $v_{\ell_5 jkms}$  is discarded. Similar procedures are applied to  $x_{ijkms}$  by replacing  
77  $i$  with one of  $j, k, m, s$  in order to get  $u_{\ell_1 j}, u_{\ell_2 k}, u_{\ell_3 m}, u_{\ell_4 s}$ . Finally,  $G$  can be computed as

$$G(\ell_1 \ell_2 \ell_3 \ell_4 \ell_5) = \sum_{i=1}^N \sum_{j=1}^2 \sum_{k=1}^4 \sum_{m=1}^3 \sum_{s=1}^2 x_{ijkms} u_{\ell_5 i} u_{\ell_1 j} u_{\ell_2 k} u_{\ell_3 m} u_{\ell_4 s} \quad (3)$$

78

## 79 2.4 TD-based unsupervised FE

80 Although the method was fully described in a recently published book (Taguchi, 2020), we summarize  
81 the process of selecting genes starting from the TD.

- 82 • To identify which singular value vectors attributed to samples (e.g., cell lines, type of histone  
83 modification, cell cycle phase, and replicates) are associated with the desired properties (e.g., “not  
84 dependent upon replicates or cell lines,” “represents re-activation,” and “distinct between input and  
85 histone modifications”), the number of singular value vectors selected are not decided in advance, since  
86 there is no way to know how singular value vectors behave in advance, because of the unsupervised  
87 nature of TD.
- 88 • To identify which singular value vectors attributed to genomic regions are associated with the desired  
89 properties described above, core tensor,  $G$ , is investigated. We select singular value vectors attributed  
90 to genomic regions that share  $G$  with larger absolute values with the singular value vectors selected in  
91 the process mentioned earlier, because these singular value vectors attributed to genomic regions are  
92 likely associated with the desired properties.
- 93 • Using the selected singular value vectors attributed to genomic regions, those associated with the  
94 components of singular value vectors with larger absolute values are selected, because such genomic  
95 regions are likely associated with the desired properties. Usually, singular value vectors attributed

to genomic regions are assumed to obey Gaussian distribution (null hypothesis), and  $P$ -values are attributed to individual genomic regions.  $P$ -values are corrected using multiple comparison correction, and the genomic regions associated with adjusted  $P$ -values less than the threshold value are selected.

- There are no definite ways to select singular value vectors. The evaluation can only be done using the selected genes. If the selected genes are not reasonable, alternative selection of singular value vectors should be attempted. When we cannot get any reasonable genes, we abort the procedure.

To select the DNA regions of interest (i.e., those associated with transcription reactivation), we first needed to specify the singular-value vectors that are attributed to the cell line, histone modification, phases of the cell cycle, and replicates with respect to the biological feature of interest, transcription reactivation. Consider selection of a specific index set  $\ell_1, \ell_2, \ell_3, \ell_4$  as one that is associated with biological features of interest, we then select  $\ell_5$  that is associated with  $G$  with larger absolute values, since singular-value vectors  $u_{\ell_5 i}$  with  $\ell_5$  represent the degree of association between individual DNA regions and reactivation. Using  $\ell_5$ , we attribute  $P$ -values to the  $i$ th DNA region assuming that  $u_{\ell_5 i}$  obeys a Gaussian distribution (null hypothesis) using the  $\chi^2$  distribution

$$P_i = P_{\chi^2} \left[ > \left( \frac{u_{\ell_5 i}}{\sigma_{\ell_5}} \right)^2 \right], \quad (4)$$

where  $P_{\chi^2}[> x]$  is the cumulative  $\chi^2$  distribution in which the argument is larger than  $x$ , and  $\sigma_{\ell_5}$  is the standard deviation.  $P$ -values are then corrected by the BH criterion (Taguchi, 2020), and the  $i$ th DNA region associated with adjusted  $P$ -values less than 0.01 were selected as those significantly associated with transcription reactivation.

Algorithm displayed with mathematical formulas can be available in Fig. 2.

## 2.5 Enrichment analysis

Gene symbols included in the selected DNA regions were retrieved using the biomaRt package (Durinck et al., 2009) of R (R Core Team, 2019) based on the hg19 reference genome. The selected gene symbols were then uploaded to Enrichr (Kuleshov et al., 2016) for functional annotation to identify their targeting TFs.

## 2.6 DESeq2

When DESeq2 (Love et al., 2014) was applied to the present data set, six samples within each cell lines measured for three cell cycles and associated with two replicates were considered. Three cell cycles were regarded to be categorical classes associated with no rank order since we would like to detect not monotonic change between cell cycles but re-activation during them. All other parameters are defaults. Counts less than 1.0 were truncated so as to have integer values (e.g., 1400.53 was converted to 1400).

## 2.7 csaw

Since csaw (Lun and Smyth, 2015) required bam files not available in GEO, we first mapped 60 fastq files to hg38 human genome using bowtie2 (Langmead and Salzberg, 2012) where 60 fastq files in GEO ID GSE141081 were downloaded from SRA. Sam files generated by bowtie2 were converted and indexed by samtools (Li et al., 2009) and sorted bam files were generated. Generated bam files that correspond to individual combinations of cell lines and ChIP-seq were loaded into csaw in order to identify differential binding among three cell cycle phases.

### 3 RESULTS AND DISCUSSION

We first attempted to identify which singular-value vector is most strongly attributed to transcription reactivation among the vectors for cell line ( $u_{\ell_{1j}}$ ), histone modification ( $u_{\ell_{2k}}$ ), cell cycle phase ( $u_{\ell_{3m}}$ ), and replicate ( $u_{\ell_{4s}}$ ) (Fig. 3). First, we considered phase dependency. Fig. 4 shows the singular-value vectors  $u_{\ell_{3m}}$  attributed to cell cycle phases. Although  $u_{2m}$  and  $u_{3m}$  were associated with reactivation, we further considered only  $u_{3m}$  since it showed a more pronounced reactivation profile. Next, we investigated singular-value vectors  $u_{\ell_{2m}}$  attributed to histone modification (Fig. 5). There was no clearly interpretable dependence on histone modification other than for  $u_{1k}$ , which represents the lack of histone modification, since the values for H3K27ac, H3K4me1, and H3K4me3 were equivalent to the Input value that corresponds to the control condition; thus,  $u_{2k}$ ,  $u_{3k}$ , and  $u_{4k}$  were considered to have equal contributions for subsequent analyses. By contrast, since  $u_{1j}$  and  $u_{1s}$  showed no dependence on cell line and replicates, respectively, we selected these vectors for further downstream analyses (Fig. 6).

Finally, we evaluated which vector  $u_{\ell_{5i}}$  had a larger  $\sum_{\ell_2=2}^4 |G(1, \ell_2, 3, 1, \ell_5)|^\alpha$ ,  $\alpha = 1, 2, 3$  (Fig. 7); in this case, we calculated the squared sum for  $2 \leq \ell_2 \leq 4$  to consider them equally. Although we do not have any definite criterion to decide  $\alpha$  uniquely, since  $\ell_5 = 4$  always takes largest values for  $\alpha \geq 1$ ,  $\ell_5 = 4$  was further employed. The  $P$ -values attributed to the  $i$ th DNA regions were calculated using eq. (4), resulting in selection of 507 DNA regions associated with adjusted  $P$ -values less than 0.01.

We next checked whether histone modification in the selected DNA regions was associated with the following transcription reactivation properties:

1. H3K27ac should have larger values in interphase and anaphase/telophase than in prometaphase, as the definition of reactivation.
2. H3K4me1 and H3K4me3 should have constant values during all phases of the cell cycle, as the definition of a “bookmark” histone modification
3. H3K4me1 and H3K4me3 should have larger values than the Input; otherwise, they cannot be regarded to act as “bookmarks” since these histones must be significantly modified throughout these phases.

To check whether the above criteria are fulfilled, we applied six  $t$  tests to histone modifications in the 507 selected DNA regions (Table 2). The results clearly showed that histone modifications in the 507 selected DNA regions satisfied the requirements for transcription reactivation; thus, our strategy could successfully select DNA regions that demonstrate reactivation/bookmark functions of histone modification.

After confirming that selected DNA regions are associated with targeted reactivation/bookmark features, we queried all gene symbols contained within these 507 regions to the Enrichr server to identify TFs that significantly target these genes. These TFs were considered candidate bookmarks that remain bound to these DNA regions throughout the cell cycle and trigger reactivation in anaphase/telophase (i.e., after cell division is complete). Table 3 lists the TFs associated with the selected regions at adjusted  $P$ -values less than 0.05 in each of the seven categories of Enrichr.

Among the many TFs that emerged to be significantly likely to target genes included in the 507 DNA regions selected by TD-based unsupervised FE, we here focus on the biological functions of TFs that were also detected in the original study suggesting that TFs might function as histone modification bookmarks for transcription reactivation (Kang et al., 2020). RUNX was identified as an essential TF for osteogenic cell fate, and has been associated with mitotic chromosomes in multiple cell lines, including Saos-2 osteosarcoma cells and HeLa cells (Young et al. 2007). Table 4 shows the detection of RUNX family TFs in seven TF-related categories of Enrichr; three RUNX TFs were detected in at least one of the seven

TF-related categories. In addition, TEADs (Kegelman et al. 2018), JUNs (Wagner, 2002), FOXOs (Rached et al., 2010), and FosLs citepKang01072020 were reported to regulate osteoblast differentiation. Tables 5, 6, 7, and 8 show that two TEAD TFs, three JUN TFs, four FOXO TFs, and two FOSL TFs were detected in at least one of the seven TF-related categories in Enrichr, respectively.

Other than these five TF families reported in the original study (Kang et al., 2020), the TFs detected most frequently within seven TF-related categories in Enrichr were as follows (Table 9): GATA2 (Kala et al., 2009), ESR1 (Kato and Ogawa, 1994), TCF21 (Kim et al., 2017), TP53 (Ha et al., 2007), WT1 (Shandilya and Roberts, 2015), NFE2L2 (also known as NRF2 (Martin-Hurtado et al., 2019)), GATA1 (Kadauke et al., 2012), and GATA3 (Shafer et al., 2017). All of these TFs have been reported to be related to mitosis directly or indirectly, in addition to JUN and JUND, which are listed in Table 6. This further suggests the suitability of our search strategy to identify transcription reactivation bookmarks.

One might wonder why we did not compare our methods with the other methods. As can be seen in Table 1, there are only two samples each in as many as 24 categories. Therefore, it is difficult to apply standard statistical tests for pairwise comparisons between two groups including only two samples. In addition, the number of features,  $N$ , which is the number of genomic regions in this study, is as many as 1,23,817, which drastically reduces the significance of each test if we consider multiple comparison criteria that increase  $P$ -values that reject the null hypothesis. Finally, only a limited number of pairwise comparisons are meaningful; for example, we are not willing to compare the amount of H3K4me1 in the RPE1 cell line at interphase with that of H3K27ac in the U2OS cell line at prometaphase. Therefore, usual procedures that deal with pairwise comparisons comprehensively, such as Tukey's test, cannot be applied to the present data set as it is. In conclusion, we could not find any suitable method applicable to the present data set that has a small number of samples within each of as many as 24 categories, whereas the number of features is as many as 1,23,817.

In order to demonstrate inferiority of other method compared with our method, we applied DESeq2 (Love et al., 2014) to the present data set, although DESeq2 was designed to not ChIP-seq but RNA-seq. The outcome is disappointing as expected (Table 10) if it is compared with Table 2. First of all, there are no coincidences between two cell lines. Although there are as many as 4227 regions within which H3K4me1 is distinct among three cell cycle phases when RPE1 is considered, there were no regions associated with distinct H3K4me1 when U2OS was considered. In addition to this, although only H3K27ac among three histone modifications measured is expected to be distinct during three cell cycle phases, other histone modifications are sometimes detected as distinct during three cell cycle phases. Finally, the number of genomic regions considered in each comparison varies, since DESeq2 automatically discarded regions associated with low variance among distinct classes. The reason why there are no regions associated with distinct histone modification for Input and H3K4me1 when RPE1 was considered is definitely because almost all genomic regions were considered for these two comparisons; too many comparisons increase the  $P$ -values because of multiple comparison corrections. On the other hand, our proposed TD based unsupervised FE can deal with all of the genomic regions, which resulted in more stable outcomes. Thus, it is obvious that DESeq2 was inferior to TD based unsupervised FE when it is applied to the present data set.

One might still wonder if it is because of usage of DESeq2 not designed specific to ChIP-seq data. In order to confirm this point, we sought integrated approaches designed specific to treatment of ChIP-seq data. In addition, we need some approaches that enable us not only pairwise comparison but also comparisons among more than two categories, since we have to compare among three cell cycle phases, i.e., terphase, prometaphase, and anaphase/telophase. There are not so many approaches satisfying these conditions (Wu et al., 2015; Steinhäuser et al., 2016; Tu and Shao, 2017). For example, although DBChIP (Liang and

Keleş, 2011) was designed to treat ChIP-seq data set, since it was designed to be specific to TF binding, it required to input single nucleotide positions where binding proteins bind, Thus, it is not applicable to histone modification measurements where not binding points but binding regions are provided. On the other hand, although DiffBind (Stark and Brown, 2011) was designed to deal with histone modification, it can accept only pairwise comparisons. SCIFER (Xu et al., 2014) can identify enrichment within single measurement compared with input experiment, MACS2 which is modified version of MACS (Zhang et al., 2008), can also accept only pairwise comparisons, ODIN (Allhoff et al., 2014) also can accept only pairwise comparisons, RSEG (Song and Smith, 2011) also can accept only pairwise comparisons, MAnorm (Shao et al., 2012) also can accept only pairwise comparisons, HOMER (Heinz et al., 2010) also can accept only pairwise comparisons, QChIPat (Liu et al., 2013) also can accept only pairwise comparisons, diffReps (Shen et al., 2013) also can accept only pairwise comparisons, MMDiff (Schweikert et al., 2013) also can accept only pairwise comparisons, PePr Zhang et al. (2014) does not perform even pairwise comparison. ChIPComp (Chen et al., 2015) was tested toward only pairwise comparisons when it was applied to real data set. Although MultiGPS (Mahony et al., 2014) can deal with multiple files, they must be composed of condition A and its corresponding input vs condition B and its corresponding input, it cannot be applied to the present case composed of three cell cycle phases and their corresponding inputs. Thus as far as we investigated there are no approaches designed to be applicable to three independent conditions, each of which is composed of a pair of treated and input experiments.

This difficulty is because of two kinds of distinct differential binding analyses required (Fig. 8), one of which is the comparison between treated and input experiments and another of which is the comparison between two experimental conditions (e.g., patients versus healthy control, two different tissues) whereas they are easily performed in tensor representation as shown in the above. Nevertheless, in order to emphasize the inferiority of ChIP-seq specific pipeline aiming differential binding analysis toward TD based unsupervised FE, we considered csaw (Lun and Smyth, 2015) as a representative since it accepts, at least, not pairwise but comparisons among multiple conditions as performed by DESeq2 (Table 10). Table 11 shows the results. It is very disappointing as expected. For example, although H3K27ac is expected to support reactivation, differential binding region among distinct cell cycle phases in U2OS cell line is almost none (only 0.1 % of whole tested regions). Although H3K4me3 should not distinctly bind to chromosome among three cell cycles since it is expected to play a role of bookmark, it distinctly binds to chromosomes among three cell cycle phases for two cell lines. These behaviours are very contrast to those in Table 2 which exhibits the expected differential/undifferential binding to chromosome. Thus, in conclusion, even if we employ pipelines specifically designed to ChIP-Seq data analyses, they cannot outperform the results obtained by TD based unsupervised FE.

## 4 CONCLUSIONS

We applied a novel TD-based unsupervised FE method to various histone modifications across the whole human genome, and the levels of these modifications were measured during mitotic cell division to identify genes that are significantly associated with histone modifications. Potential bookmark TFs were identified by searching for TFs that target the selected genes. The TFs identified were functionally related to the cell division cycle, suggesting their potential as bookmark TFs that warrant further exploration.

## CONFLICT OF INTEREST STATEMENT

The authors declare that the research was conducted in the absence of any commercial or financial relationships that could be construed as a potential conflict of interest.

## AUTHOR CONTRIBUTIONS

YT planned and performed the study. YT and TT discussed the results and wrote the paper. All authors contributed to the article and approved the submitted version.

## FUNDING

This study was supported by KAKENHI 19H05270, 20K12067, 20H04848. This project was also funded by the Deanship of Scientific Research (DSR) at King Abdulaziz University, Jeddah, under grant no. KEP-8- 611-38. The authors, therefore, acknowledge DSR with thanks for providing technical and financial support

## ACKNOWLEDGMENTS

This manuscript will be released as a pre-print at BioRxiv.

## SUPPLEMENTAL DATA

Additional file 1: Genes identified by TD-based unsupervised FE; Additional file 2: Potential TFs that target identified genes (in Additional file 1) identified by Enrichr; [Additional file 3: Sample R code used in the analyses performed in this study.](#)

## DATA AVAILABILITY STATEMENT

All datasets analyzed in this study were obtained from GEO: GSE141139

## REFERENCES

- Festuccia N, Gonzalez I, Owens N, Navarro P. Mitotic bookmarking in development and stem cells. *Development* **144** (2017) 3633–3645. doi:10.1242/dev.146522.
- Bellec M, Radulescu O, Lagha M. Remembering the past: Mitotic bookmarking in a developing embryo. *Current Opinion in Systems Biology* **11** (2018) 41 – 49. doi:https://doi.org/10.1016/j.coisb.2018.08.003.
- Zaidi SK, Nickerson JA, Imbalzano AN, Lian JB, Stein JL, Stein GS. Mitotic gene bookmarking: An epigenetic program to maintain normal and cancer phenotypes. *Molecular Cancer Research* **16** (2018) 1617–1624. doi:10.1158/1541-7786.MCR-18-0415.
- Teves SS, An L, Hansen AS, Xie L, Darzacq X, Tjian R. A dynamic mode of mitotic bookmarking by transcription factors. *eLife* **5** (2016) e22280. doi:10.7554/eLife.22280.
- John S, Workman JL. Bookmarking genes for activation in condensed mitotic chromosomes. *BioEssays* **20** (1998) 275–279. doi:10.1002/(SICI)1521-1878(199804)20:4<275::AID-BIES1>3.0.CO;2-P.
- Wang F, Higgins JM. Histone modifications and mitosis: countermarks, landmarks, and bookmarks. *Trends in Cell Biology* **23** (2013) 175–184. doi:10.1016/j.tcb.2012.11.005.
- Kouskouti A, Talianidis I. Histone modifications defining active genes persist after transcriptional and mitotic inactivation. *The EMBO Journal* **24** (2005) 347–357. doi:10.1038/sj.emboj.7600516.
- Chow CM, Georgiou A, Szutorisz H, Maia e Silva A, Pombo A, Barahona I, et al. Variant histone h3.3 marks promoters of transcriptionally active genes during mammalian cell division. *EMBO reports* **6** (2005) 354–360. doi:10.1038/sj.embor.7400366.
- Dey A, Ellenberg J, Farina A, Coleman AE, Maruyama T, Sciortino S, et al. A bromodomain protein, mcap, associates with mitotic chromosomes and affects g2-to-m transition. *Molecular and Cellular Biology* **20** (2000) 6537–6549. doi:10.1128/MCB.20.17.6537-6549.2000.

- 290 Kadauke S, Udugama MI, Pawlicki JM, Achtman JC, Jain DP, Cheng Y, et al. Tissue-specific mitotic  
291 bookmarking by hematopoietic transcription factor GATA1. *Cell* **150** (2012) 725–737. doi:10.1016/j.  
292 cell.2012.06.038.
- 293 Xing H, Wilkerson DC, Mayhew CN, Lubert EJ, Skaggs HS, Goodson ML, et al. Mechanism of hsp70i  
294 gene bookmarking. *Science* **307** (2005) 421–423. doi:10.1126/science.1106478.
- 295 Christova R, Oelgeschläger T. Association of human TFIID–promoter complexes with silenced mitotic  
296 chromatin in vivo. *Nature Cell Biology* **4** (2001) 79–82. doi:10.1038/ncb733.
- 297 Festuccia N, Dubois A, Vandormael-Pournin S, Tejeda EG, Mouren A, Bessonard S, et al. Mitotic binding  
298 of esrrb marks key regulatory regions of the pluripotency network. *Nature Cell Biology* **18** (2016)  
299 1139–1148. doi:10.1038/ncb3418.
- 300 Kang H, Shokhirev MN, Xu Z, Chandran S, Dixon JR, Hetzer MW. Dynamic regulation of histone  
301 modifications and long-range chromosomal interactions during postmitotic transcriptional reactivation.  
302 *Genes & Development* **34** (2020) 913–930. doi:10.1101/gad.335794.119.
- 303 Taguchi YH. *Unsupervised Feature Extraction Applied to Bioinformatics* (Springer International  
304 Publishing) (2020). doi:10.1007/978-3-030-22456-1.
- 305 Durinck S, Spellman PT, Birney E, Huber W. Mapping identifiers for the integration of genomic datasets  
306 with the r/bioconductor package biomart. *Nature Protocols* **4** (2009) 1184–1191.
- 307 R Core Team. *R: A Language and Environment for Statistical Computing*. R Foundation for Statistical  
308 Computing, Vienna, Austria (2019).
- 309 Kuleshov MV, Jones MR, Rouillard AD, Fernandez NF, Duan Q, Wang Z, et al. Enrichr: a comprehensive  
310 gene set enrichment analysis web server 2016 update. *Nucleic Acids Research* **44** (2016) W90–W97.  
311 doi:10.1093/nar/gkw377.
- 312 Love MI, Huber W, Anders S. Moderated estimation of fold change and dispersion for RNA-seq data with  
313 DESeq2. *Genome Biology* **15** (2014). doi:10.1186/s13059-014-0550-8.
- 314 Lun AT, Smyth GK. csaw: a Bioconductor package for differential binding analysis of ChIP-seq data using  
315 sliding windows. *Nucleic Acids Research* **44** (2015) e45–e45. doi:10.1093/nar/gkv1191.
- 316 Langmead B, Salzberg SL. Fast gapped-read alignment with bowtie 2. *Nature Methods* **9** (2012) 357–359.  
317 doi:10.1038/nmeth.1923.
- 318 Li H, Handsaker B, Wysoker A, Fennell T, Ruan J, Homer N, et al. The Sequence Alignment/Map format  
319 and SAMtools. *Bioinformatics* **25** (2009) 2078–2079. doi:10.1093/bioinformatics/btp352.
- 320 Wagner EF. Functions of ap1 (fos/jun) in bone development. *Annals of the Rheumatic Diseases* **61** (2002)  
321 ii40–ii42. doi:10.1136/ard.61.suppl\_2.ii40.
- 322 Rached MT, Kode A, Xu L, Yoshikawa Y, Paik JH, DePinho RA, et al. FoxO1 is a positive regulator  
323 of bone formation by favoring protein synthesis and resistance to oxidative stress in osteoblasts. *Cell*  
324 *Metabolism* **11** (2010) 147–160. doi:10.1016/j.cmet.2010.01.001.
- 325 Kala K, Haugas M, Lilleväli K, Guimera J, Wurst W, Salminen M, et al. Gata2 is a tissue-specific post-  
326 mitotic selector gene for midbrain gabaergic neurons. *Development* **136** (2009) 253–262. doi:10.1242/  
327 dev.029900.
- 328 Kato R, Ogawa H. An essential gene, ESR1, is required for mitotic growth, DNA repair and meiotic  
329 recombination *Saccharomyces cerevisiae*. *Nucleic Acids Research* **22** (1994) 3104–3112. doi:10.1093/  
330 nar/22.15.3104.
- 331 Kim JB, Pjanic M, Nguyen T, Miller CL, Iyer D, Liu B, et al. TCF21 and the environmental sensor  
332 aryl-hydrocarbon receptor cooperate to activate a pro-inflammatory gene expression program in coronary  
333 artery smooth muscle cells. *PLOS Genetics* **13** (2017) 1–29. doi:10.1371/journal.pgen.1006750.

- 334 Ha GH, Baek KH, Kim HS, Jeong SJ, Kim CM, McKeon F, et al. p53 activation in response to mitotic  
335 spindle damage requires signaling via BubR1-mediated phosphorylation. *Cancer Research* **67** (2007)  
336 7155–7164. doi:10.1158/0008-5472.CAN-06-3392.
- 337 Shandilya J, Roberts SG. A role of WT1 in cell division and genomic stability. *Cell Cycle* **14** (2015)  
338 1358–1364. doi:10.1080/15384101.2015.1021525. PMID: 25789599.
- 339 Martin-Hurtado A, Martin-Morales R, Robledinos-Antón N, Blanco R, Palacios-Blanco I, Lastres-Becker  
340 I, et al. NRF2-dependent gene expression promotes ciliogenesis and hedgehog signaling. *Scientific*  
341 *Reports* **9** (2019). doi:10.1038/s41598-019-50356-0.
- 342 Shafer ME, Nguyen AH, Tremblay M, Viala S, Béland M, Bertos NR, et al. Lineage specification from  
343 prostate progenitor cells requires Gata3-dependent mitotic spindle orientation. *Stem Cell Reports* **8**  
344 (2017) 1018–1031. doi:10.1016/j.stemcr.2017.02.004.
- 345 Wu DY, Bittencourt D, Stallcup MR, Siegmund KD. Identifying differential transcription factor binding in  
346 chip-seq. *Frontiers in Genetics* **6** (2015) 169. doi:10.3389/fgene.2015.00169.
- 347 Steinhauser S, Kurzawa N, Eils R, Herrmann C. A comprehensive comparison of tools for differential  
348 ChIP-seq analysis. *Briefings in Bioinformatics* **17** (2016) 953–966. doi:10.1093/bib/bbv110.
- 349 Tu S, Shao Z. An introduction to computational tools for differential binding analysis with ChIP-seq data.  
350 *Quantitative Biology* **5** (2017) 226–235. doi:10.1007/s40484-017-0111-8.
- 351 Liang K, Keleş S. Detecting differential binding of transcription factors with ChIP-seq. *Bioinformatics* **28**  
352 (2011) 121–122. doi:10.1093/bioinformatics/btr605.
- 353 Stark R, Brown G. *DiffBind: differential binding analysis of ChIP-Seq peak data* (2011). Bioconductor.
- 354 Xu S, Grullon S, Ge K, Peng W. Spatial clustering for identification of ChIP-enriched regions (SICER) to  
355 map regions of histone methylation patterns in embryonic stem cells. *Methods in Molecular Biology*  
356 (Springer New York) (2014), 97–111. doi:10.1007/978-1-4939-0512-6\_5.
- 357 Zhang Y, Liu T, Meyer CA, Eeckhoutte J, Johnson DS, Bernstein BE, et al. Model-based analysis of  
358 ChIP-seq (MACS). *Genome Biology* **9** (2008) R137. doi:10.1186/gb-2008-9-9-r137.
- 359 Allhoff M, Seré K, Chauvistré H, Lin Q, Zenke M, Costa IG. Detecting differential peaks in ChIP-seq  
360 signals with ODIN. *Bioinformatics* **30** (2014) 3467–3475. doi:10.1093/bioinformatics/btu722.
- 361 Song Q, Smith AD. Identifying dispersed epigenomic domains from ChIP-Seq data. *Bioinformatics* **27**  
362 (2011) 870–871. doi:10.1093/bioinformatics/btr030.
- 363 Shao Z, Zhang Y, Yuan GC, Orkin SH, Waxman DJ. MAnorm: a robust model for quantitative comparison  
364 of ChIP-seq data sets. *Genome Biology* **13** (2012) R16. doi:10.1186/gb-2012-13-3-r16.
- 365 Heinz S, Benner C, Spann N, Bertolino E, Lin YC, Laslo P, et al. Simple combinations of lineage-  
366 determining transcription factors prime cis-regulatory elements required for macrophage and b cell  
367 identities. *Molecular Cell* **38** (2010) 576–589. doi:10.1016/j.molcel.2010.05.004.
- 368 Liu B, Yi J, SV A, Lan X, Ma Y, Huang TH, et al. QChIPat: a quantitative method to identify distinct  
369 binding patterns for two biological ChIP-seq samples in different experimental conditions. *BMC*  
370 *Genomics* **14** (2013) S3. doi:10.1186/1471-2164-14-s8-s3.
- 371 Shen L, Shao NY, Liu X, Maze I, Feng J, Nestler EJ. diffreps: Detecting differential chromatin modification  
372 sites from chip-seq data with biological replicates. *PLOS ONE* **8** (2013) 1–13. doi:10.1371/journal.pone.  
373 0065598.
- 374 Schweikert G, Cseke B, Clouaire T, Bird A, Sanguinetti G. MMDiff: quantitative testing for shape changes  
375 in ChIP-seq data sets. *BMC Genomics* **14** (2013) 826. doi:10.1186/1471-2164-14-826.
- 376 Zhang Y, Lin YH, Johnson TD, Rozek LS, Sartor MA. PePr: a peak-calling prioritization pipeline to  
377 identify consistent or differential peaks from replicated ChIP-Seq data. *Bioinformatics* **30** (2014)  
378 2568–2575. doi:10.1093/bioinformatics/btu372.

- 
- 379 Chen L, Wang C, Qin ZS, Wu H. A novel statistical method for quantitative comparison of multiple  
 380 ChIP-seq datasets. *Bioinformatics* **31** (2015) 1889–1896. doi:10.1093/bioinformatics/btv094.  
 381 Mahony S, Edwards MD, Mazzoni EO, Sherwood RI, Kakumanu A, Morrison CA, et al. An integrated  
 382 model of multiple-condition chip-seq data reveals predeterminants of cdx2 binding. *PLOS Computational*  
 383 *Biology* **10** (2014) 1–14. doi:10.1371/journal.pcbi.1003501.

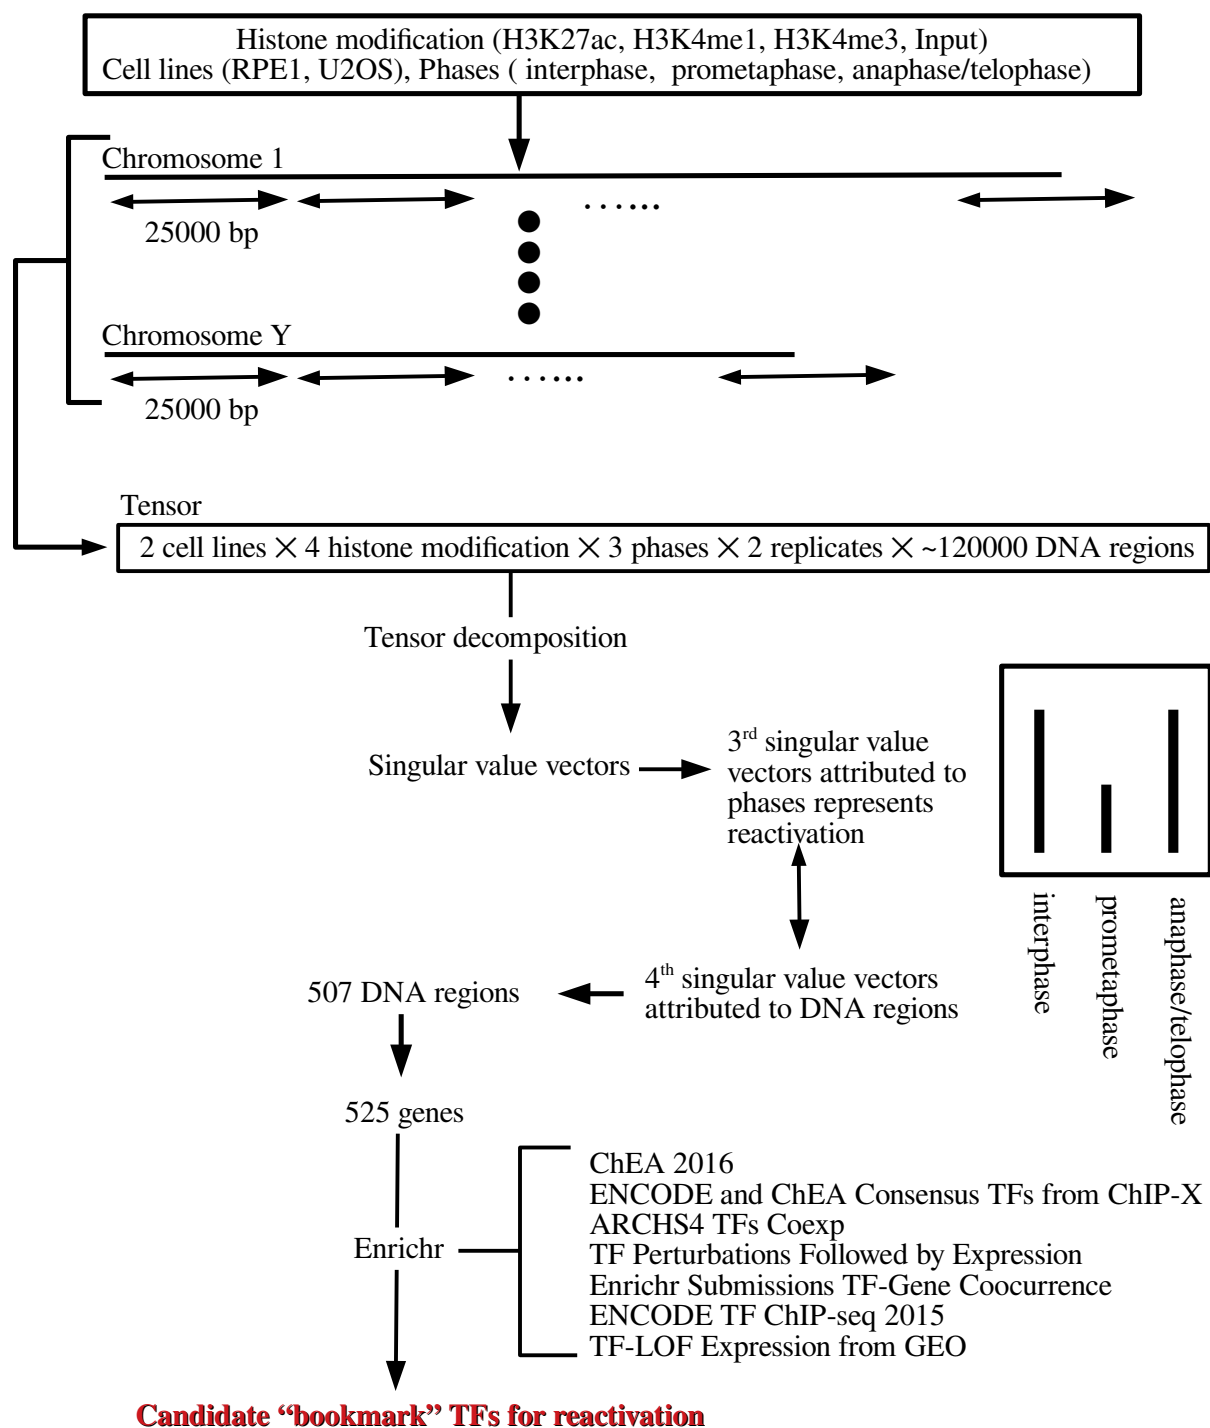

**Figure 1.** Flow chart of analyses performed in this study

Algorithm of TD based unsupervised FE

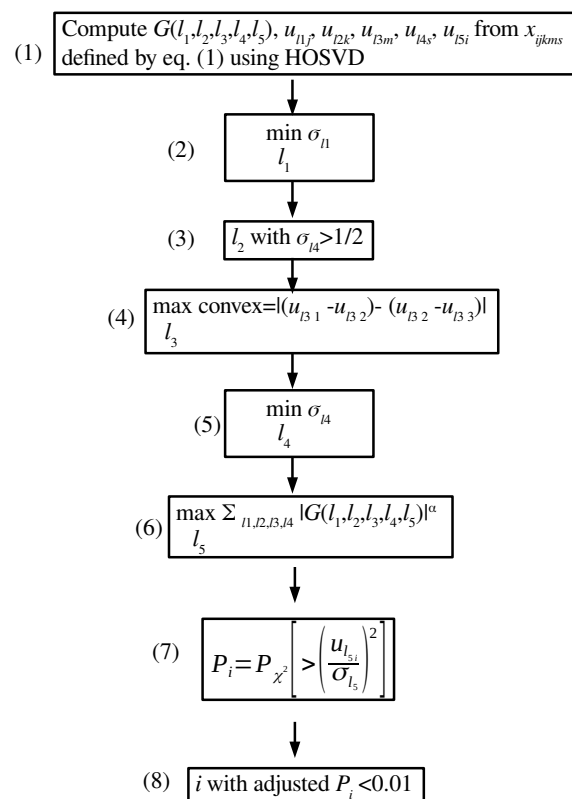

**Figure 2.** Algorithm of TD based unsupervised FE. (1) Perform TD to derive  $G(l_1, l_2, l_3, l_4, l_5)$ . (2) Select  $u_{l_1j}$  that takes constant values between two cell lines as much as possible. (3) Select  $u_{l_2k}$  that has distinct values for Histone modification toward inputs. (4) Select  $u_{l_3m}$  that represents reactivation during three cell cycle phases as much as possible. (5) Select  $u_{l_4s}$  that takes constant values between two biological replicates as much as possible. (6) Select  $l_5$  associated with  $G$  having largest absolute values given  $l_1, l_2, l_3, l_4$  (7) Attribute  $P$ -values to  $i$ s with assuming that  $u_{l_5i}$  obeys Gaussian distribution (Null hypothesis). (8) Select  $i$ s associated with adjusted  $P$ -values less than 0.01.

**Table 1.** Combinations of experimental conditions. Individual conditions are associated with two replicates

| Phases             | Histone modifications |      |         |      |         |      |       |      |
|--------------------|-----------------------|------|---------|------|---------|------|-------|------|
|                    | Cell lines            |      |         |      | Input   |      |       |      |
|                    | H3K27ac               |      | H3K4me1 |      | H3K4me3 |      | Input |      |
|                    | RPE1                  | U2OS | RPE1    | U2OS | RPE1    | U2OS | RPE1  | U2OS |
| interphase         | ○                     | ○    | ○       | ○    | ○       | ○    | ○     | ○    |
| prometaphase       | ○                     | ○    | ○       | ○    | ○       | ○    | ○     | ○    |
| anaphase/telophase | ○                     | ○    | ○       | ○    | ○       | ○    | ○     | ○    |

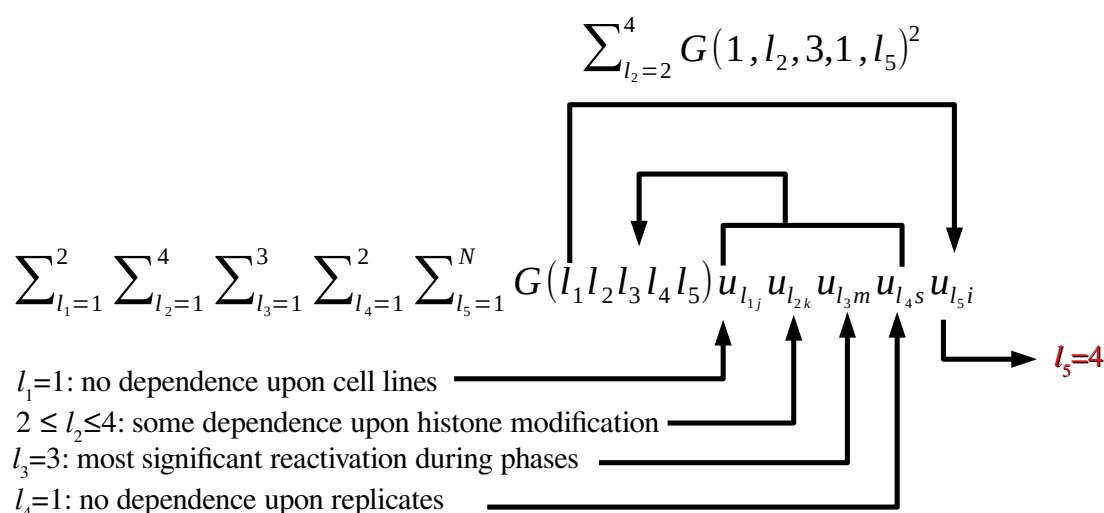

**Figure 3.** Schematic of the process for selecting  $u_{4i}$  to be used for DNA region selection.

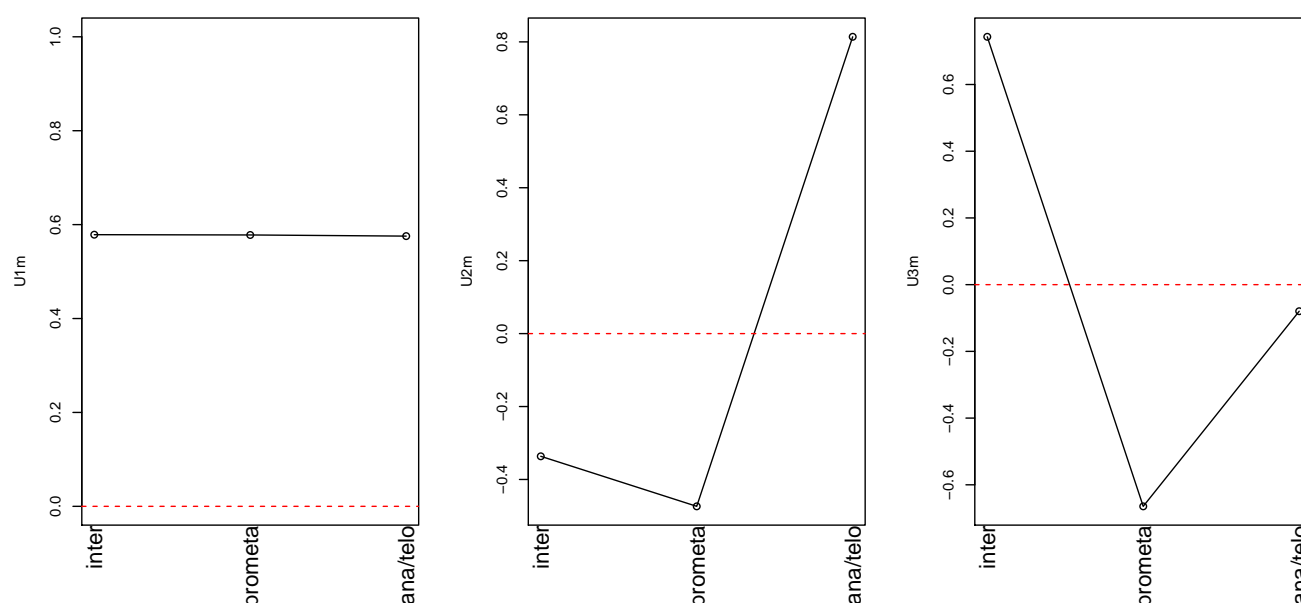

**Figure 4.** Singular-value vectors associated with cell cycle phase. Left:  $u_{1m}$ , middle:  $u_{2m}$ , right:  $u_{3m}$

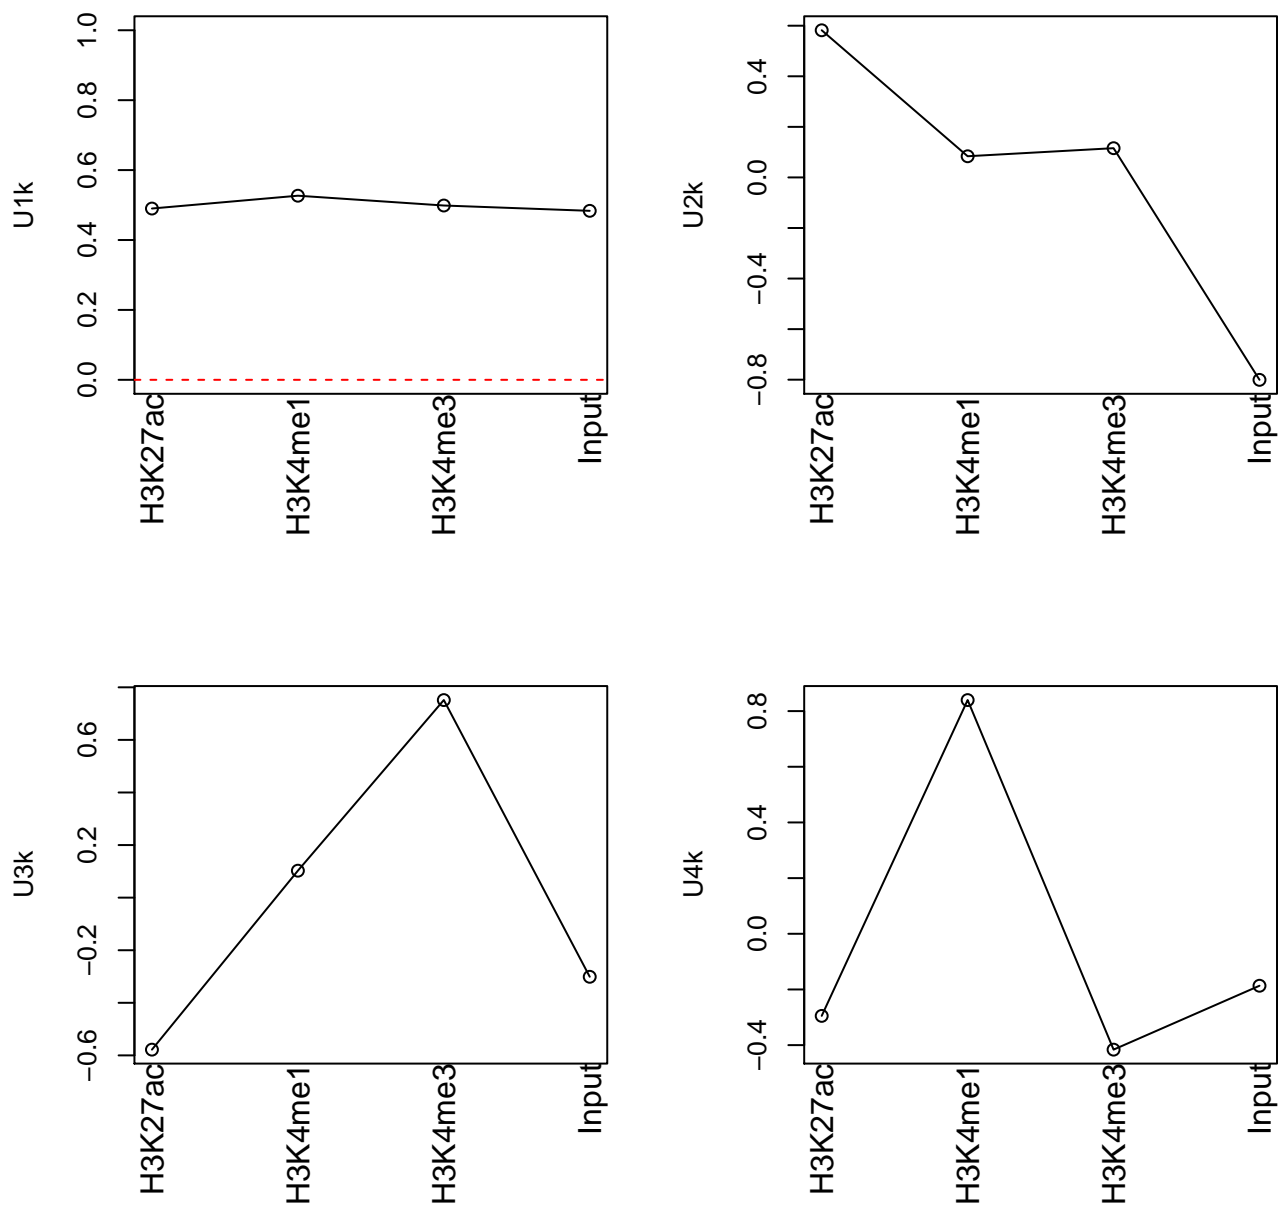

**Figure 5.** Singular-value vectors associated with histone modification. Upper left:  $u_{1k}$ , upper right:  $u_{2k}$ , lower left:  $u_{3k}$ , lower right:  $u_{4k}$

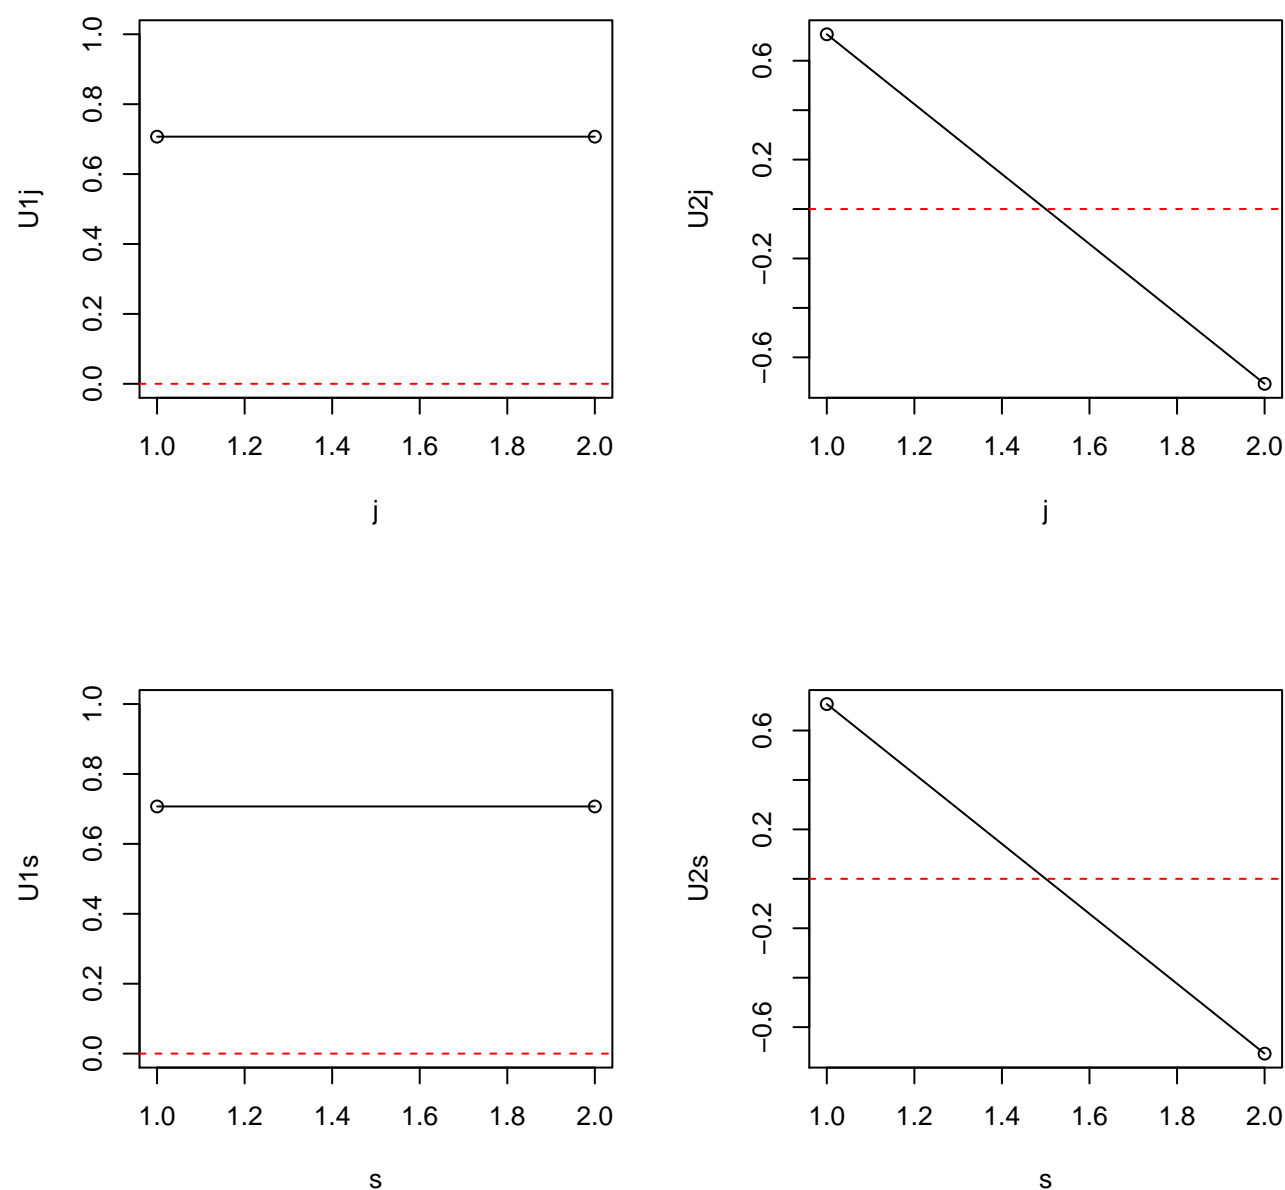

**Figure 6.** Dependence of vectors on cell line ( $j$ ) and replicate ( $s$ ). Top left:  $u_{1j}$ , top right:  $u_{2j}$ , bottom left:  $u_{1s}$ , bottom right:  $u_{2s}$

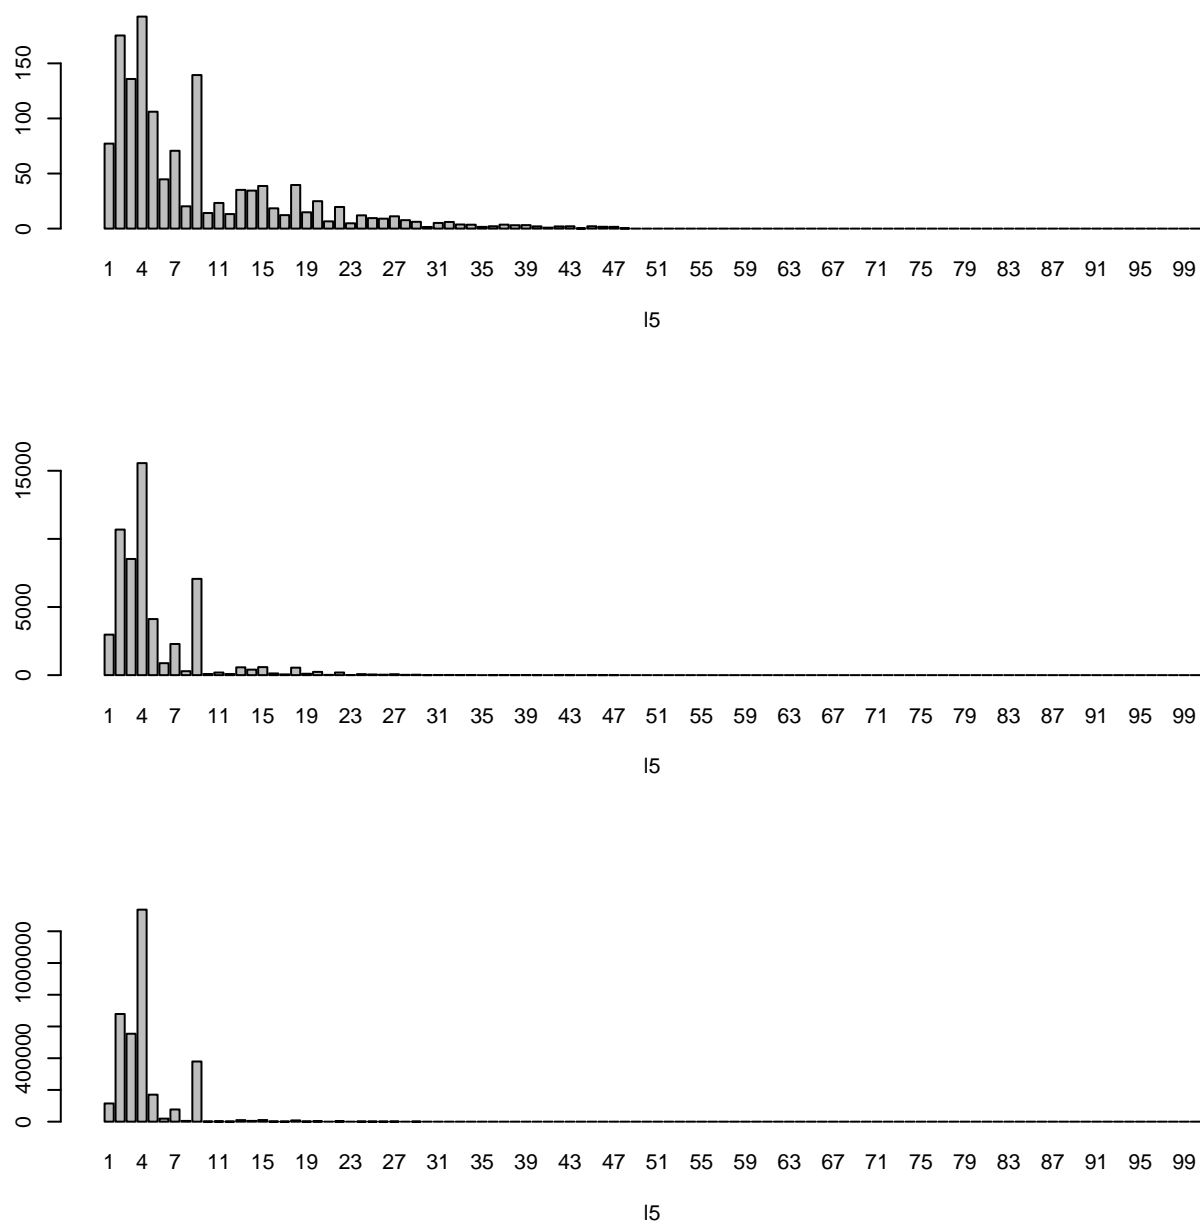

**Figure 7.**  $\sum_{\ell_2=2}^4 |G(1, \ell_2, 3, 1, \ell_5)|^\alpha, \ell_5 \leq 100$ . Because of HOSVD algorithm,  $G(\ell_1, \ell_2, \ell_3, \ell_4, \ell_5) = 0$  for  $\ell_5 > 2 \times 4 \times 3 \times 2 = 48$ .  $\alpha = 1$  (Top), 2 (middle), and 3 (bottom).

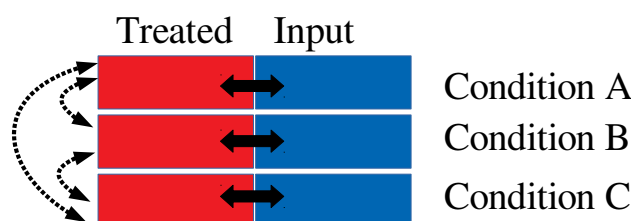

**Figure 8.** Schematics that illustrates the difficulty of differential binding analysis. In contrast to differential expression analysis that requires only inter conditions comparisons (displayed by broken bidirectional arrows), differential binding analysis requires additional intra conditions comparisons between treated and input experiment (displayed by bidirectional solid arrows). There are no pipelines that aim to identify differential binding considering simultaneously more than two conditions.

**Table 2.** Hypotheses for  $t$  tests applied to histone modification in the selected 507 DNA regions. The null hypothesis was that the inequality relationship of the alternative hypothesis is replaced with an equality relationship. int: interphase, ana: anaphase, tel: telophase, pro: prometaphase.

| Test | Alternative hypothesis                        | $P$ -value            | Description of desired relationships       |
|------|-----------------------------------------------|-----------------------|--------------------------------------------|
| 1    | $\{x_{ij1ms}   m = 1, 3\} > \{x_{ij12s}\}$    | $3.30 \times 10^{-3}$ | H3K27ac reactivation (int & ana/tel > pro) |
| 2    | $\{x_{ij2ms}   m = 1, 3\} \neq \{x_{ij22s}\}$ | 0.60                  | H3K4me1 bookmark (int & ana/tel = pro)     |
| 3    | $\{x_{ij3ms}   m = 1, 3\} \neq \{x_{ij32s}\}$ | 0.72                  | H3K4me3 bookmark (int & ana/tel = pro)     |
| 4    | $\{x_{ij4ms}   m = 1, 3\} \neq \{x_{ij42s}\}$ | 0.86                  | Input as control (int & ana/tel = pro)     |
| 5    | $\{x_{ij2ms}\} > \{x_{ij4ms}\}$               | $8.98 \times 10^{-6}$ | H3K4me1 > Input                            |
| 6    | $\{x_{ij3ms}\} > \{x_{ij4ms}\}$               | $3.79 \times 10^{-3}$ | H3K4me3 > Input                            |

**Table 3.** Number of transcription factors (TFs) associated with adjusted  $P$ -values less than 0.05 in various TF-related Enrichr categories

|       |                                           | Adjusted P-values |        |
|-------|-------------------------------------------|-------------------|--------|
|       | Terms                                     | > 0.05            | < 0.05 |
| (I)   | ChEA 2016                                 | 537               | 97     |
| (II)  | ENCODE and ChEA Consensus TFs from ChIP-X | 91                | 12     |
| (III) | ARCHS4 TFs Coexp                          | 1533              | 54     |
| (IV)  | TF Perturbations Followed by Expression   | 1577              | 346    |
| (V)   | Enrichr Submissions TF-Gene Cooccurrence  | 587               | 1135   |
| (VI)  | ENCODE TF ChIP-seq 2015                   | 788               | 28     |
| (VII) | TF-LOF Expression from GEO                | 239               | 11     |

**Table 4.** Identification of RUNX transcription factor (TF) family members within seven TF-related categories in Enrichr. Roman numerals correspond to the first column in Table 3.

|   | TF    | (I) | (II) | (III) | (IV) | (V) | (VI) | (VII) |
|---|-------|-----|------|-------|------|-----|------|-------|
| 1 | RUNX1 | ○   |      |       | ○    |     |      |       |
| 2 | RUNX2 | ○   |      |       |      |     |      |       |
| 3 | RUNX3 |     |      |       |      | ○   |      |       |

**Table 5.** Identification of TEAD transcription factor (TF) family members within seven TF-related categories in Enrichr. Roman numerals correspond to the first column in Table 3.

|   | TF    | (I) | (II) | (III) | (IV) | (V) | (VI) | (VII) |
|---|-------|-----|------|-------|------|-----|------|-------|
| 1 | TEAD4 | ○   |      |       |      |     | ○    |       |
| 2 | TEAD3 |     |      | ○     |      |     |      |       |

**Table 6.** Identification of JUN transcription factor (TF) family members within seven TF-related categories in Enrichr. Roman numerals correspond to the first column in Table 3.

|   | TF   | (I) | (II) | (III) | (IV) | (V) | (VI) | (VII) |
|---|------|-----|------|-------|------|-----|------|-------|
| 1 | JUN  | ○   |      |       | ○    | ○   | ○    |       |
| 2 | JUND | ○   |      |       | ○    | ○   | ○    |       |
| 3 | JUNB |     |      |       | ○    | ○   |      |       |

**Table 7.** Identification of FOXO transcription factor (TF) family members within seven TF-related categories in Enrichr. Roman numerals correspond to the first column in Table 3.

|   | TF    | (I) | (II) | (III) | (IV) | (V) | (VI) | (VII) |
|---|-------|-----|------|-------|------|-----|------|-------|
| 1 | FOXO1 |     |      |       | ○    | ○   |      |       |
| 2 | FOXO3 | ○   |      |       |      |     |      |       |
| 3 | FOXO4 |     |      |       |      | ○   |      |       |
| 4 | FOXO6 |     |      |       |      | ○   |      |       |

**Table 8.** Identification of FosL transcription factor (TF) family members within seven TF-related categories in Enrichr. Roman numerals correspond to the first column in Table 3.

|   | TF    | (I) | (II) | (III) | (IV) | (V) | (VI) | (VII) |
|---|-------|-----|------|-------|------|-----|------|-------|
| 1 | FOSL2 |     | ○    |       |      |     | ○    |       |
| 2 | FOSL1 |     |      |       | ○    |     | ○    |       |

**Table 9.** Top 10 most frequently listed transcription factor (TF) families (at least four, considered the majority) within seven TF-related categories in Enrichr. Roman numerals correspond to the first column in Table 3.

|    | TF     | (I) | (II) | (III) | (IV) | (V) | (VI) | (VII) |
|----|--------|-----|------|-------|------|-----|------|-------|
| 1  | GATA2  | ○   | ○    |       | ○    | ○   | ○    |       |
| 2  | ESR1   | ○   | ○    |       | ○    | ○   | ○    |       |
| 3  | TCF21  | ○   |      | ○     | ○    | ○   |      |       |
| 4  | TP53   | ○   | ○    |       | ○    | ○   |      |       |
| 5  | JUN    | ○   |      |       | ○    | ○   | ○    |       |
| 6  | JUND   | ○   |      |       | ○    | ○   | ○    |       |
| 7  | WT1    | ○   |      |       | ○    | ○   |      | ○     |
| 8  | NFE2L2 | ○   | ○    |       | ○    | ○   |      |       |
| 9  | GATA1  | ○   | ○    |       | ○    | ○   |      |       |
| 10 | GATA3  |     |      |       | ○    | ○   | ○    | ○     |

**Table 10.** The performances achieved by DESeq2 applied to the present data set. AdjP: adjusted *P*-values computed by DESeq2

|         | RPE1        |             | U2OS        |             |
|---------|-------------|-------------|-------------|-------------|
|         | AdjP > 0.01 | AdjP < 0.01 | AdjP > 0.01 | AdjP < 0.01 |
| H3K27ac | 30649       | 1829        | 28849       | 1425        |
| H3K4me1 | 113784      | 0           | 52323       | 4227        |
| H3K4me3 | 26420       | 8259        | 24359       | 1559        |
| Input   | 112976      | 0           | 5995        | 196         |

**Table 11.** The performances achieved by csaw applied to the present data set. Adj<sub>p</sub>: adjusted *P*-values computed by csaw

|         | RPE1                    |                         | U2OS                    |                         |
|---------|-------------------------|-------------------------|-------------------------|-------------------------|
|         | Adj <sub>p</sub> > 0.01 | Adj <sub>p</sub> < 0.01 | Adj <sub>p</sub> > 0.01 | Adj <sub>p</sub> < 0.01 |
| H3K27ac | 4127704                 | 113803                  | 4477318                 | 6126                    |
| H3K4me1 | 5552148                 | 0                       | 6060553                 | 5                       |
| H3K4me3 | 3054309                 | 140962                  | 2197717                 | 27570                   |
| Input   | 3310106                 | 0                       | 5040796                 | 0                       |
